# Supplementary material
Source: publisher figshare collection journal article supplement (https://sage.figshare.com/ndownloader/files/13176149)
Supplement: Supplementary file 1 [file 13176149]

**Supplementary file S2.** Preferences as indicated in the study advance directive (AD) by 80/101 intervention participants. Values are numbers (percentages).

| Outcomes                                                                                                                                | Completed study AD<br>(n=80) |
|-----------------------------------------------------------------------------------------------------------------------------------------|------------------------------|
| Appointed decision-maker                                                                                                                |                              |
| - no                                                                                                                                    | 2 (3)                        |
| - yes, one                                                                                                                              | 9 (11)                       |
| - yes, two or three                                                                                                                     | 69 (86)                      |
| Cardiopulmonary resuscitation                                                                                                           |                              |
| - I want to be resuscitated unless my doctor considers that medically futile                                                            | 7 (9)                        |
| - I do not want to be resuscitated in case of a cardiac arrest                                                                          | 63 (79)                      |
| - no option or both options indicated                                                                                                   | 10 (13)                      |
| Medical treatments                                                                                                                      |                              |
| When the doctor considers it likely, that I will no longer be capable of meaningful contact with my family, friends and others, I want: |                              |
| - full treatment as long as it makes sense                                                                                              | 3 (4)                        |
| - care that focuses on comfort, well-being and symptoms. My life will not be extended, but not shortened either                         | 67 (84)                      |
| - no option or both options indicated                                                                                                   | 10 (13)                      |
| In the situation as described above I want:                                                                                             |                              |
| - artificial feeding                                                                                                                    | 16 (20)                      |
| - hospital admissions for medical treatment and surgery                                                                                 | 20 (25)                      |
| - artificial ventilation                                                                                                                | 16 (20)                      |
